# Supplementary material for: Development of Biocompatible HA Hydrogels Embedded with a New Synthetic Peptide Promoting Cellular Migration for Advanced Wound Care Management
Source: PubMed Central journal article supplement (PMC6247053; doi:10.1002/advs.201800852), 2018-09-21
Supplement: ADVS-5-1800852-s001.pdf [file ADVS-5-1800852-s001.pdf]

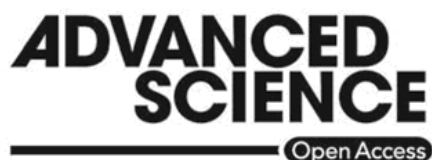

## Supporting Information

for *Adv. Sci.*, DOI: 10.1002/advs.201800852

Development of Biocompatible HA Hydrogels Embedded  
with a New Synthetic Peptide Promoting Cellular Migration  
for Advanced Wound Care Management

*Sun Young Wang, Hyosuk Kim, Gijung Kwak, Hong Yeol  
Yoon, Sung Duk Jo, Ji Eun Lee, Daeho Cho, Ick Chan Kwon,\*  
and Sun Hwa Kim\**

## Supporting Information

**Development of Biocompatible HA Hydrogels Embedded with a New Synthetic Peptide Promoting Cellular Migration for Advanced Wound Care Management**

*Sun Young Wang, Hyosuk Kim, Gijung Kwak, Hong Yeol Yoon, Sung Duk Jo, Ji Eun Lee, Daeho Cho, Ick Chan Kwon\*, and Sun Hwa Kim\**

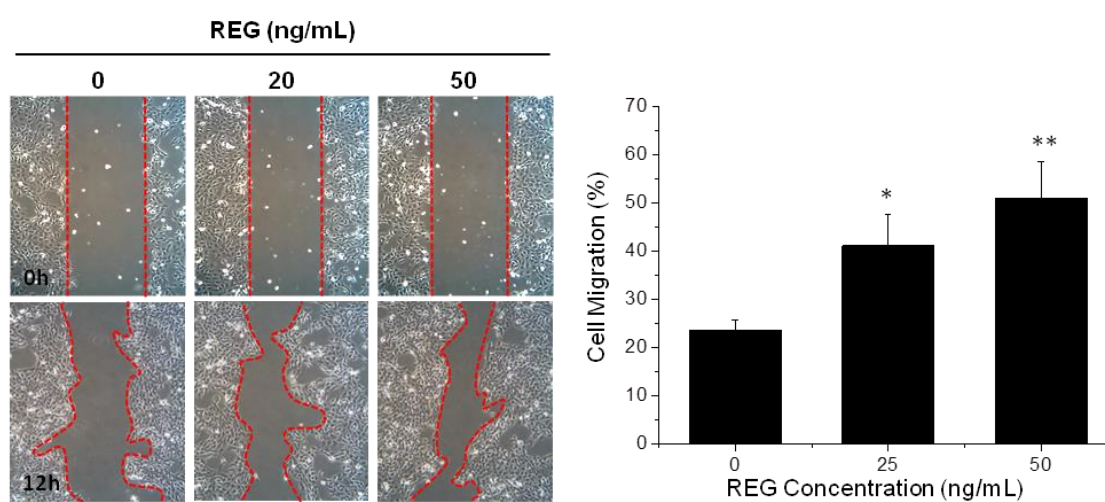

**Figure S1.** Wound scratch assay with HaCat keratinocytes and quantification of migrated cells.  $n = 4$ , \*  $p < 0.05$ , \*\*  $p < 0.01$  vs saline-treated cells.

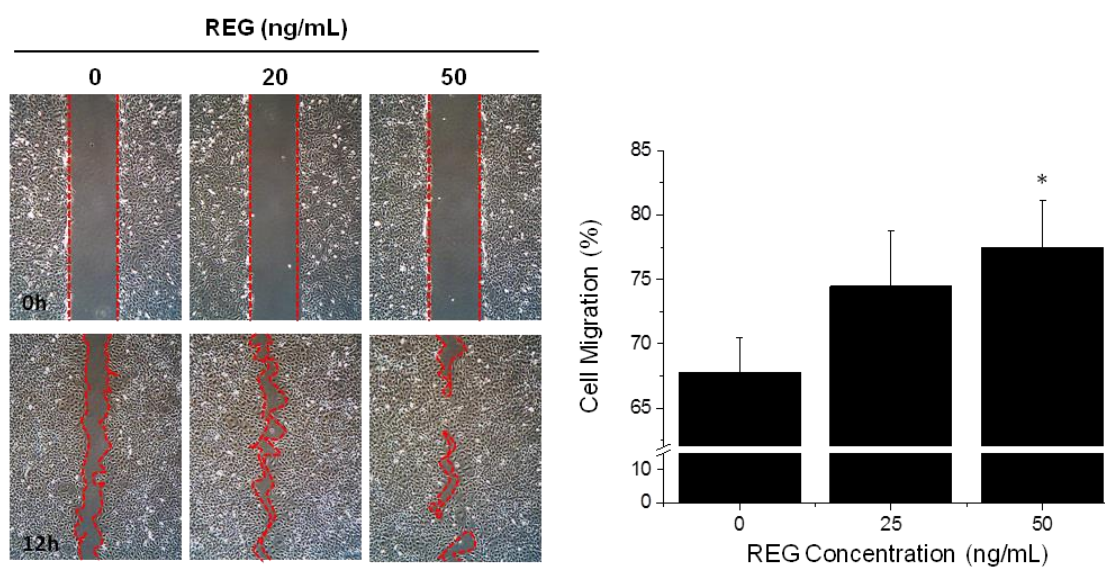

**Figure S2.** Wound scratch assay with SVEC4 endothelial cells and quantification of migrated cells.  $n = 4$ , \*  $p < 0.05$  vs saline-treated cells.

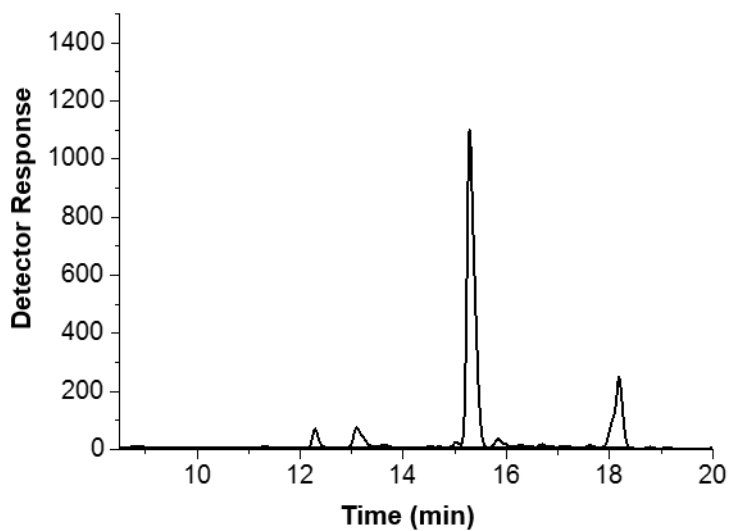

**Figure S3.** HPLC analysis of MMP2-activatable probe. The peak at 15.3 min retention time indicates a successful conjugation of MMP2 peptide probe.

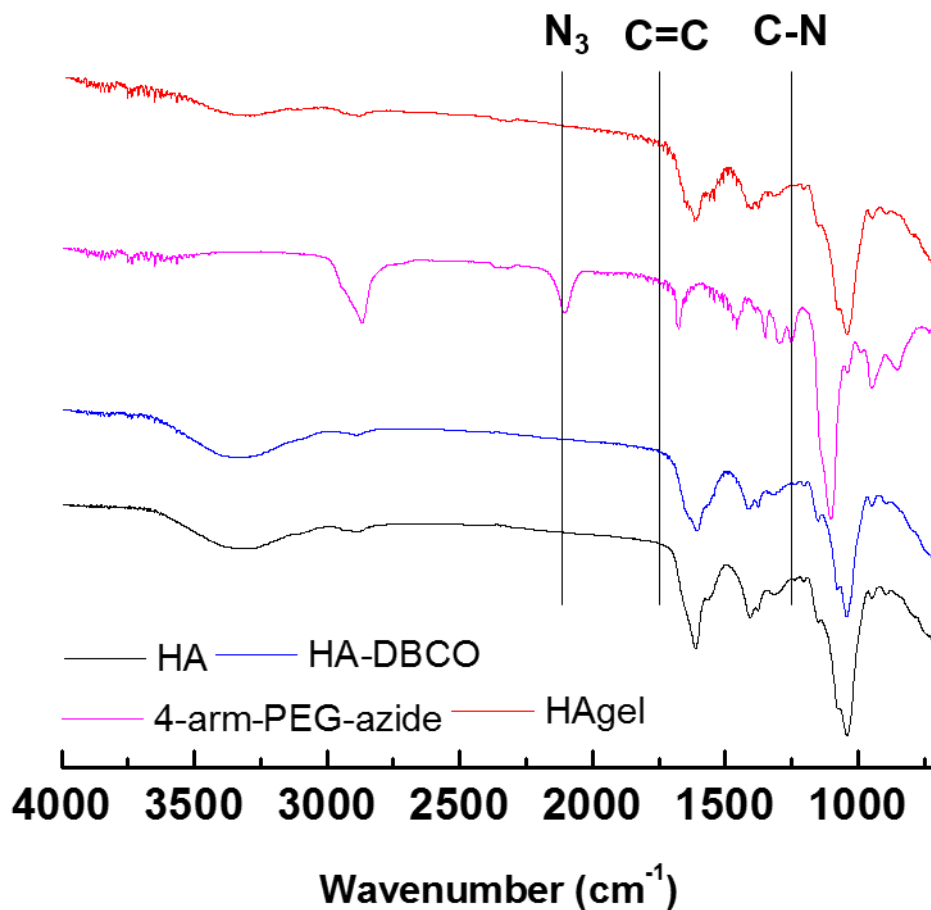

**Figure S4.** ATR FT-IR spectra of HA, HA-DBCO, 4-arm-PEG-azide and HAgel in the range of 4000 to 700  $\text{cm}^{-1}$ .

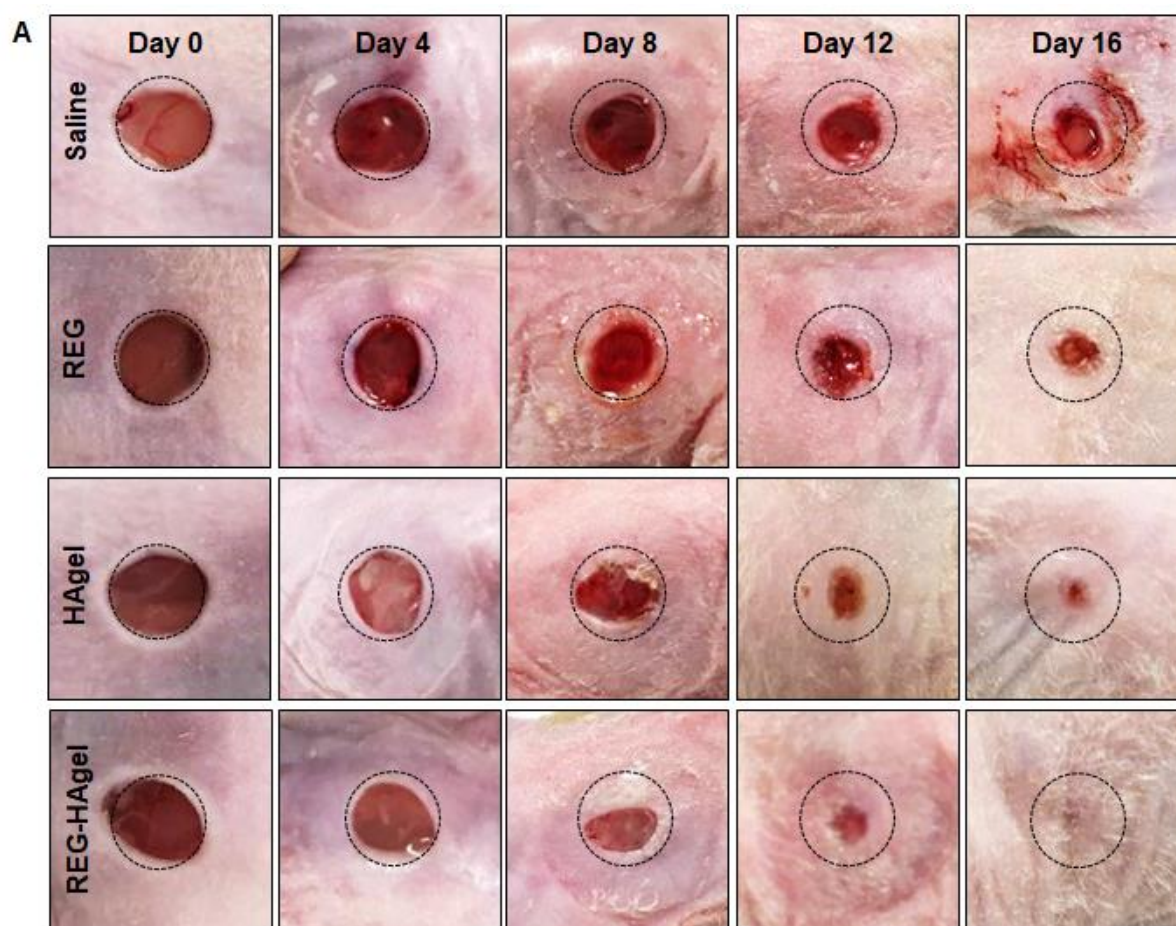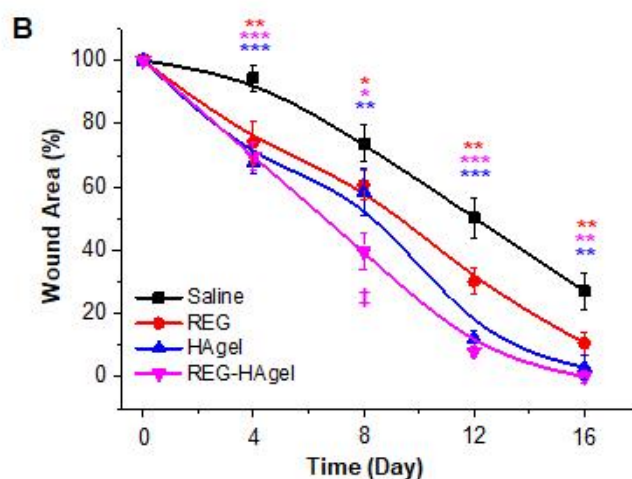

**Figure S5.** Therapeutic effect of REG, HAgel and REG-HAgel in Balb/c nude mouse. A) Representative photographic images of 6 mm wide full-thickness wounds over 16 days of experiment, and B) quantification of wound sizes.  $n = 3$ ; \*  $p < 0.05$ , \*\*  $p < 0.01$ , \*\*\*  $p < 0.005$  vs Saline. ‡  $p < 0.01$  vs HAgel.

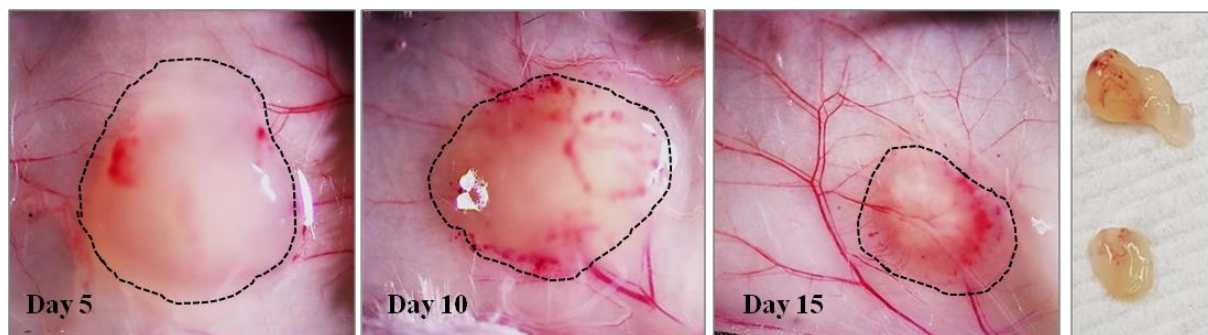

**Figure S6.** Optical images of subcutaneously implanted HA gel observed over 15 days.
